# Supplementary material
Source: publisher site journal article supplement (https://www.dovepress.com/article/456942)
Supplement: Supplementary file 1 [file get_supplementary_file.php]

**Supplementary Material**

**Supplementary Table 1 Information for healthy controls and Parkinson’s disease patients**

|  | Normal(N=16) | PD(N=28) | Statistic | P value |
| --- | --- | --- | --- | --- |
| Age (years) | 71.12±7.55 | 70.39±10.81 | t=0.239 | 0.812 |
| Age of onset | / | 66.18±12.18 | - | - |
| Gender |  |  |  |  |
| Male  Famale |  |  | χ²=1.459 | 0.56 |
| 11(68.75%) | 14(50.00%) |
| 5(31.25%) | 14(50.00%) |
| Stage |  |  |  |  |
| early | / | 10(35.71%) | - | - |
| Middle to late | 18(64.29%) |
| Medication |  |  |  |  |
| Madopar | / | 15(53.57%) | - | - |
| Sinemet | 5(17.86%) |
| No medication | 8(28.57%) |

**Supplementary Table 2 The coefficients of the 15 hub genes**

| Gene Name | Coefficient |
| --- | --- |
| FABP5 | -0.0720261 |
| CCR4 | 0.0127993 |
| EBI3 | -0.013988 |
| IGKC | -0.0188864 |
| GALR3 | 0.002209 |
| IL4 | -0.0059331 |
| SEMA6B | 0.160174 |
| CD3E | 0.1031543 |
| AVP | 0.1295766 |
| RBP5 | 0.0166429 |
| CYSLTR2 | 0.0375396 |
| NRAS | -0.0617692 |
| CBL | 0.0668332 |
| RELA | 0.0423327 |
| OGFR | 0.1407628 |

The coefficients derived from Lasso regression represent the contribution of each hub gene to the prediction results. If the coefficient of a specific hub gene is positive, it indicates a positive correlation between that gene and the target variable; whereas, a negative coefficient indicates a negative correlation.
